# Supplementary material for: Enhancing short-term electron exchange in pyrogenic carbonaceous materials through post-pyrolysis oxidative treatments
Source: Royal Society of Chemistry journal article supplement (doi:10.1039/d5ma00727e), 2025-11-12
Supplement: d5ma00727e1.pdf [file d5ma00727e1.pdf]

# Enhancing short-term electron exchange in pyrogenic carbonaceous materials through post-pyrolysis oxidative treatments

Ethan Quinn, Detlef R. U. Knappe, and Douglas F. Call\*

Department of Civil, Construction, and Environmental Engineering, North Carolina State  
University, Campus Box 7908, Raleigh, USA

\*Corresponding author: Douglas F. Call, [dfcall@ncsu.edu](mailto:dfcall@ncsu.edu)

## Supplementary Information

### 1. Supplementary Methods

#### 1.1 Conversion of Oxygen Content (CHN(O)S Analysis)

1. Conversion of Wt% to weight percentage (At%):

$$At\%[O] = \frac{Wt\%[O] \div MW[O]}{\sum (Wt\% \div MW)_{all}} \times 100\% \quad (1)$$

2. Conversion of Wt% to mmols/g-AC:

$$Oxygen\ Content \left( \frac{mmols}{g-AC} \right) = \frac{Wt\%[O]}{MW[O]} \times 1000 \frac{mmols}{mole} \quad (2)$$

Wt%[O] and MW[O] represent the weight percentage and the molecular weight for oxygen as reported by CHN(O)S.  $\sum (Wt\% \div MW)_{all}$  represents the sum of the Wt% divided by the molecular weight for all other elements analyzed.

### 2. Supplementary Tables

#### 2.1 CHN(O)S Analysis

**Table S1.** CHN(O)S elemental composition (Wt-% & At-%) for X-AC, 30 min. treated H<sub>2</sub>O<sub>2</sub>-AC, and 30 min. treated HNO<sub>3</sub>-AC samples. Standard deviations represent the standard error of duplicates.

|                                   | Elemental Composition |              |             |             |             |             |        |       |              |             |
|-----------------------------------|-----------------------|--------------|-------------|-------------|-------------|-------------|--------|-------|--------------|-------------|
| Material                          | Carbon                |              | Hydrogen    |             | Nitrogen    |             | Sulfur |       | Oxygen       |             |
|                                   | Wt-%                  | At-%         | Wt-%        | At-%        | Wt-%        | At-%        | Wt-%   | At-%  | Wt-%         | At-%        |
| X-AC                              | 93.76 ± 0.69          | 92.45 ± 0.13 | 0.46 ± 0.01 | 5.40 ± 0.12 | 0.16 ± 0.00 | 0.14 ± 0.00 | <0.02  | <0.02 | 2.71 ± 0.057 | 2.01 ± 0.04 |
| H <sub>2</sub> O <sub>2</sub> -AC | 93.31 ± 0.90          | 92.45 ± 2.57 | 0.34 ± 0.23 | 4.01 ± 2.61 | 0.64 ± 0.56 | 0.54 ± 0.47 | <0.02  | <0.02 | 4.03 ± 0.46  | 3.00 ± 0.34 |
| HNO <sub>3</sub> -AC              | 84.99 ± 1.20          | 83.3 ± 2.00  | 0.50 ± 0.04 | 5.83 ± 0.48 | 1.08 ± 0.03 | 0.91 ± 0.03 | <0.02  | <0.02 | 13.61 ± 1.90 | 10.0 ± 1.40 |

## 2.2 Density Functional Theory Analysis

**Table S2.** Quantitative specific surface area and pore volume data obtained for X-AC, H<sub>2</sub>O<sub>2</sub>-AC, and HNO<sub>3</sub>-AC samples through DFT analysis via an Autosorb iQ system.

| Sample                                      | DFT specific surface<br>area (m <sup>2</sup> /g-AC) | Micropore volume<br>(mL/g-AC) | Mesopore volume<br>(mL/g-AC) |
|---------------------------------------------|-----------------------------------------------------|-------------------------------|------------------------------|
| X-AC (30 min.)                              | 1518.5(±10.5)                                       | 0.527(±0.005)                 | 0.099(±0.021)                |
| H <sub>2</sub> O <sub>2</sub> -AC (30 min.) | 1420.8(±11.3)                                       | 0.494(±0.005)                 | 0.083(±0.011)                |
| H <sub>2</sub> O <sub>2</sub> -AC (2 min.)  | 1512.9(±12.9)                                       | 0.541(±0.004)                 | 0.071(±0.002)                |
| HNO <sub>3</sub> -AC (30 min.)              | 1264.5(±10.4)                                       | 0.429(±0.003)                 | 0.043(±0.004)                |
| HNO <sub>3</sub> -AC (0.5 min.)             | 1348.8(±9.21)                                       | 0.469(±0.003)                 | 0.059(±0.003)                |

## 3. Supplementary Figures

### 3.1 Electron accepting capacities

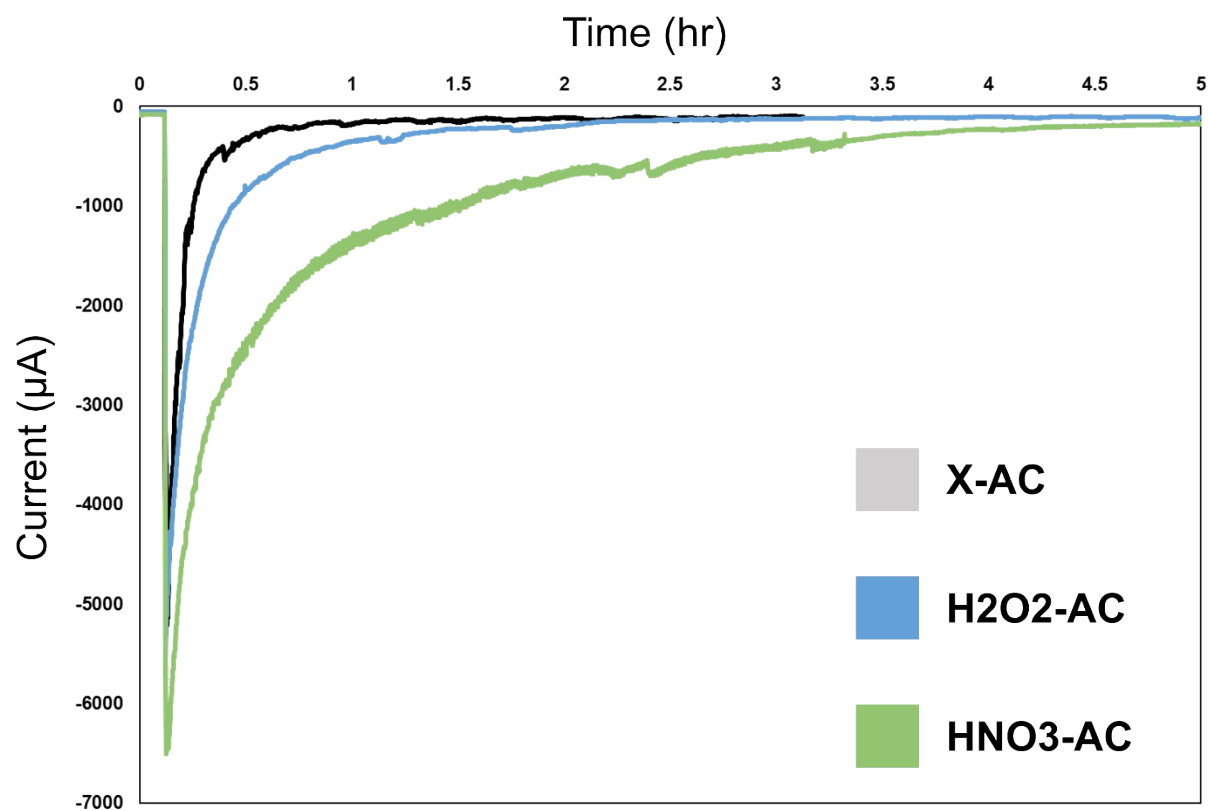

**Fig. S1** Example of the current profile for X-AC, 30 min. treated  $\text{H}_2\text{O}_2$ -AC, and 30 min. treated  $\text{HNO}_3$ -AC upon injection of the sample into the electrochemical cell.

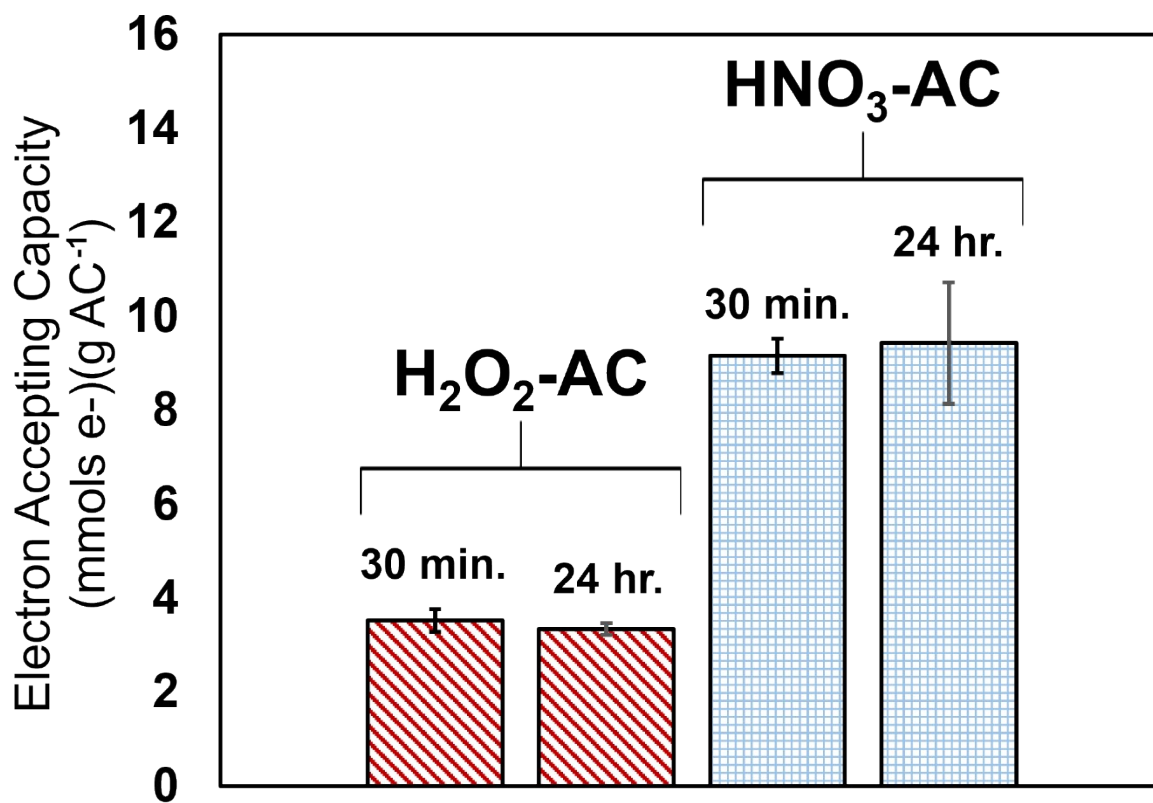

**Fig. S2.** Comparisons between the electron accepting capacities of H<sub>2</sub>O<sub>2</sub>-AC and HNO<sub>3</sub>-AC treated for 30 minutes and 24 hours. Error bars represent the standard error of three replicates.

### 3.2 Electron accepting kinetics

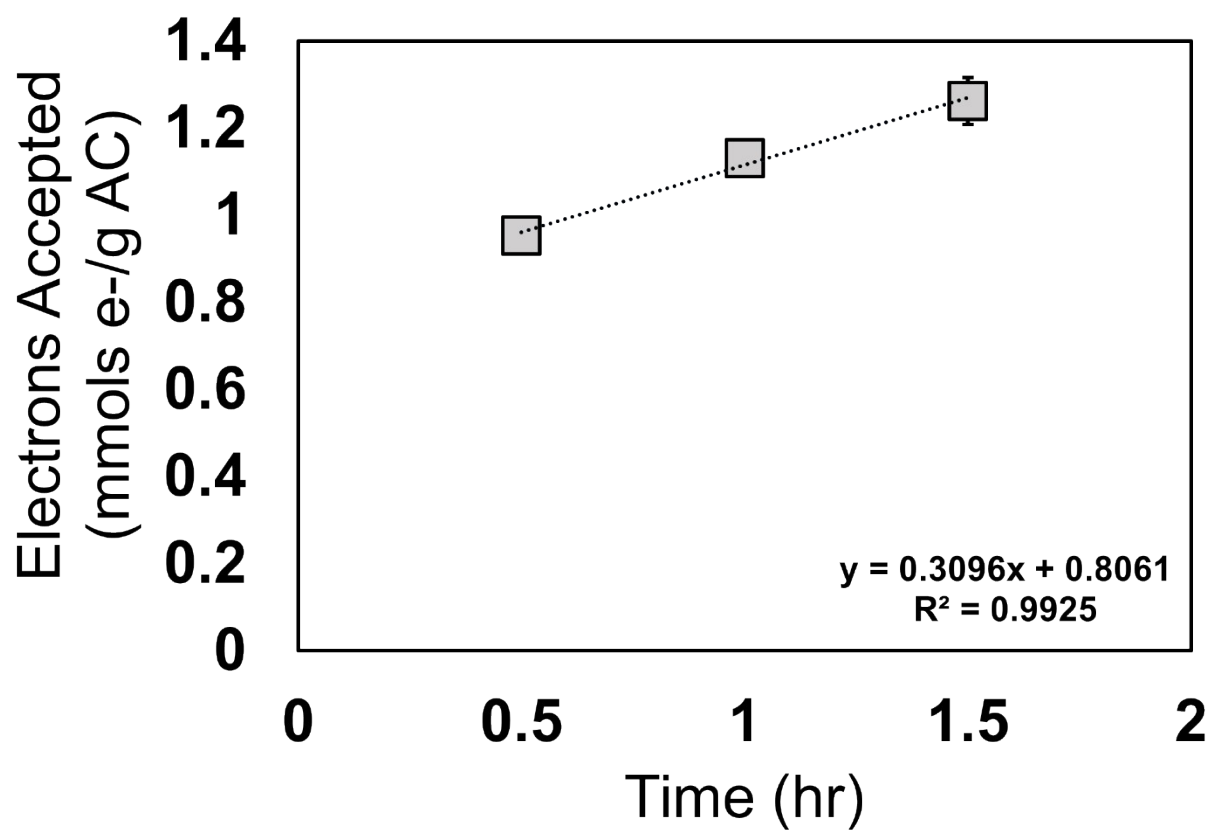

**Fig. S3.** Electron accepting capacity as a function of time for X-AC over the timescale of 0.5 hrs – 1.5 hrs. Error bars represent the standard error of triplicates.

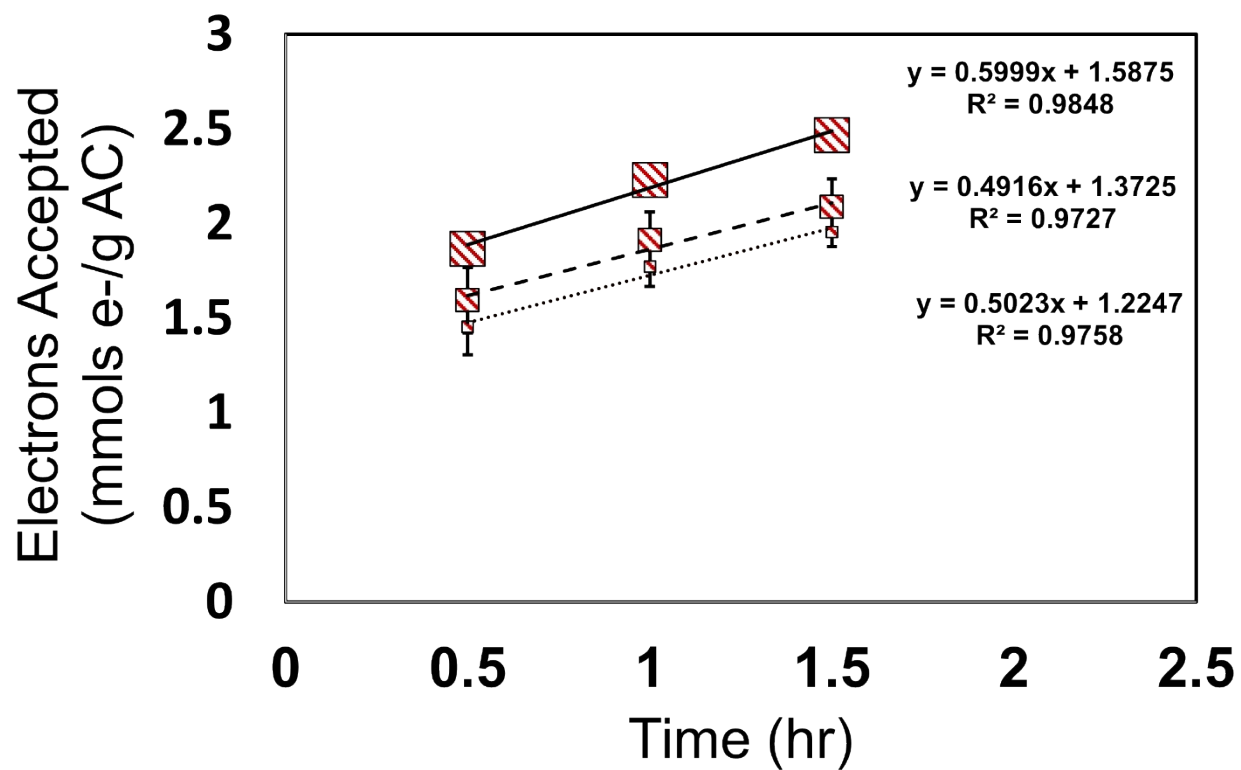

**Fig. S4.** Electron accepting capacity as a function of time for H<sub>2</sub>O<sub>2</sub>-AC samples over the timescale of 0.5 hrs – 1.5 hrs. Equations and trendlines correspond in descending order to 30 min. treated, 5 min. treated, and 2 min. treated H<sub>2</sub>O<sub>2</sub>-AC. Error bars represent the standard error of triplicates.

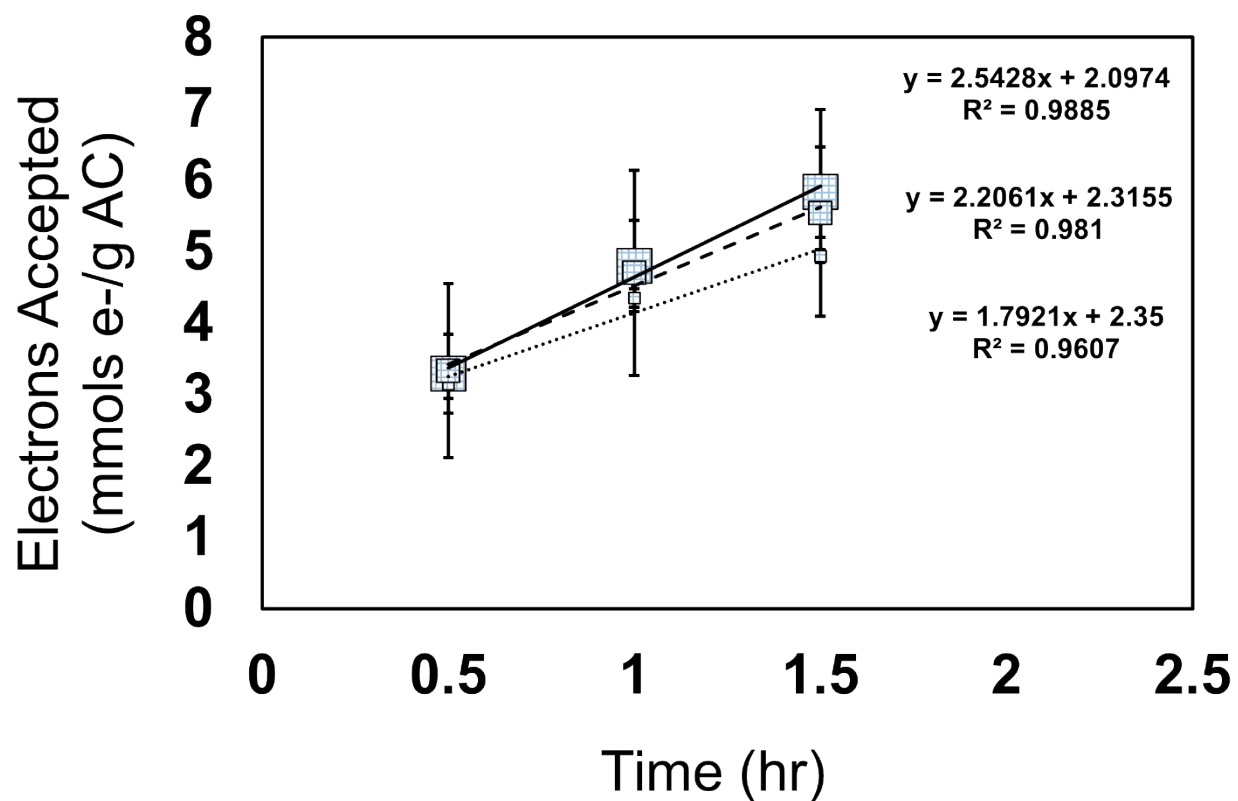

**Fig. S5.** Electron accepting capacity as a function of time for HNO<sub>3</sub>-AC samples over the timescale of 0.5 hrs – 1.5 hrs. Equations and trendlines correspond in descending order to 30 min. treated, 5 min. treated, and 0.5 min. treated HNO<sub>3</sub>-AC. Error bars represent the standard error of triplicates.

### 3.3 X-Ray Photoelectron Spectroscopy

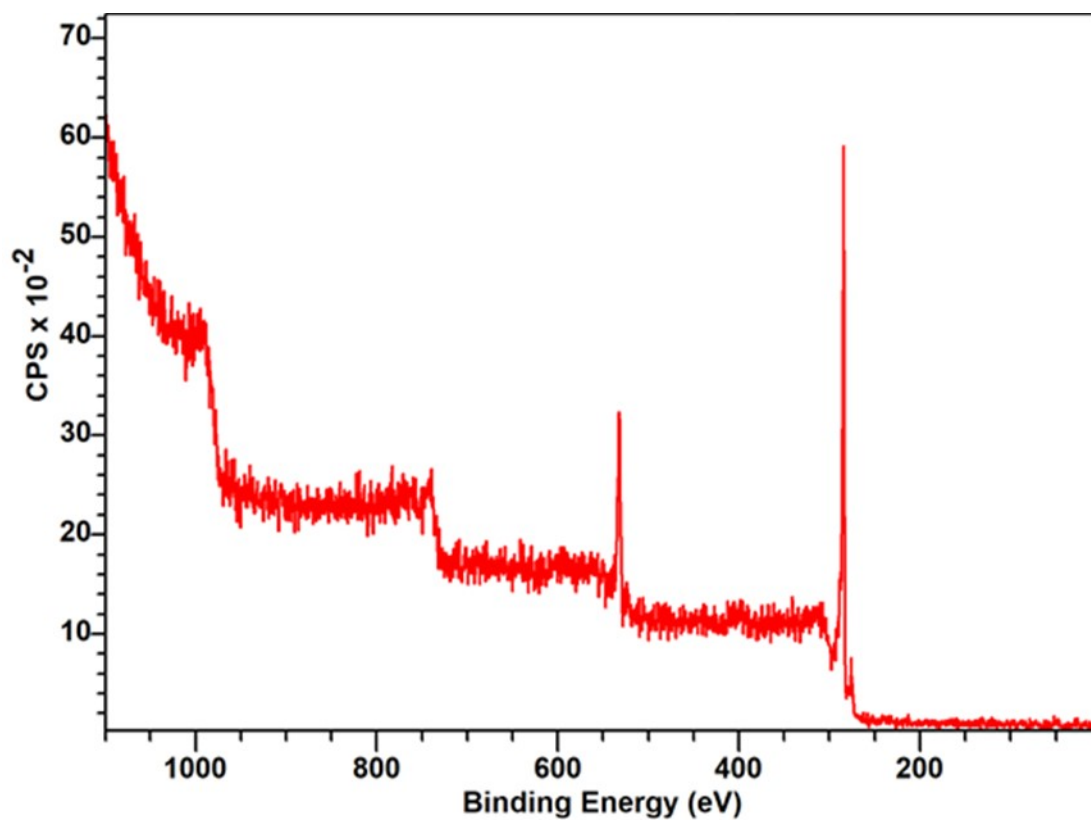

**Fig. S6.** Survey scan for example for a 30 minute treated HNO<sub>3</sub>-AC sample. Survey scans for all materials corresponded to the same general structure seen here. This sample was chosen as an example since the identifiable features seen at binding energies of ~285 eV (C 1s) and ~530 eV, which were present in all samples, were most easily seen here.



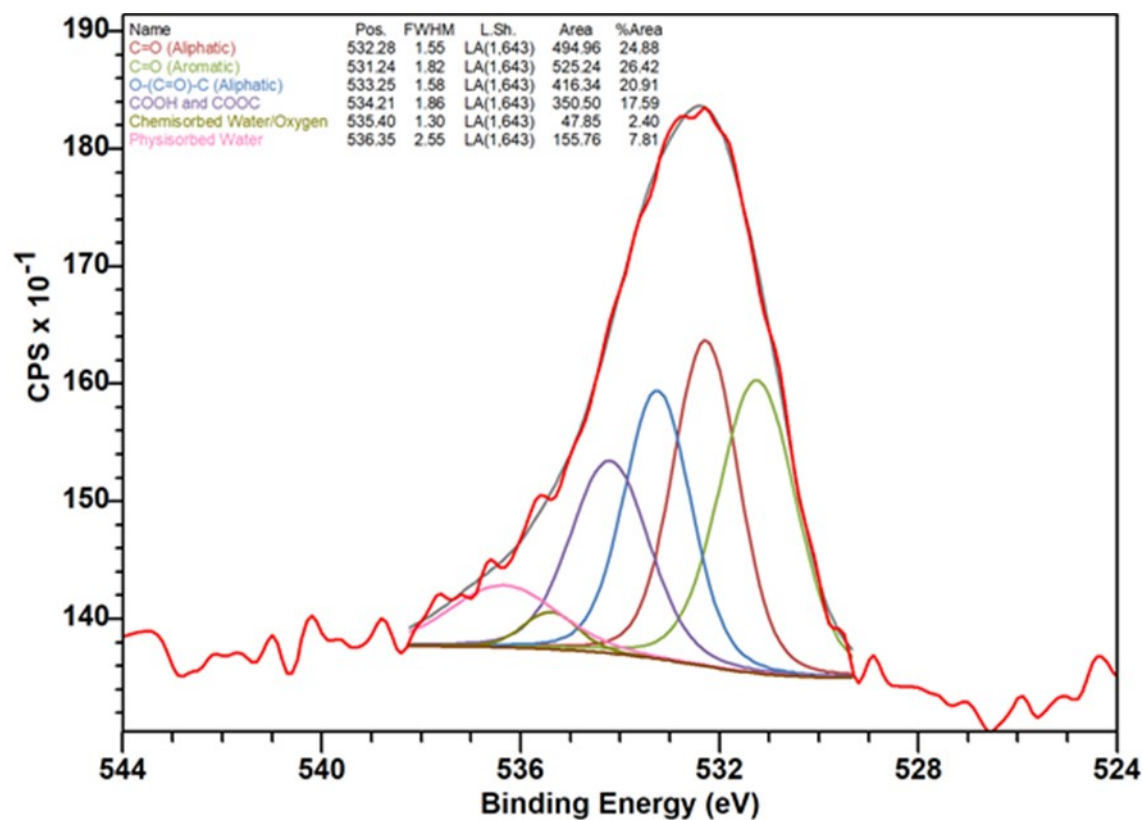

**Fig. S7.** Zoomed in and deconvoluted O 1s peak for a X-AC sample. Peak fitting was conducted through manual entry of individual functional groups binding energies.

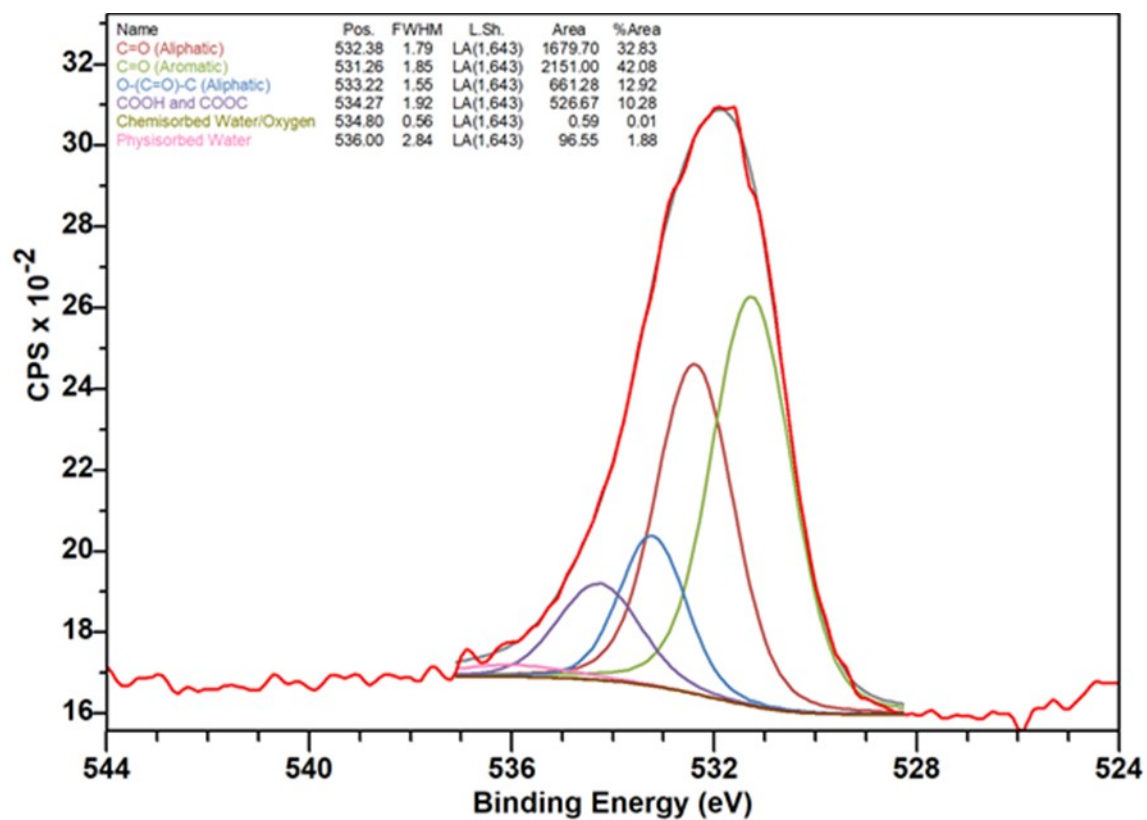

**Fig. S8.** Zoomed in and deconvoluted O 1s peak for an H<sub>2</sub>O<sub>2</sub>-AC sample. Peak fitting was conducted through manual entry of individual functional groups binding energies.

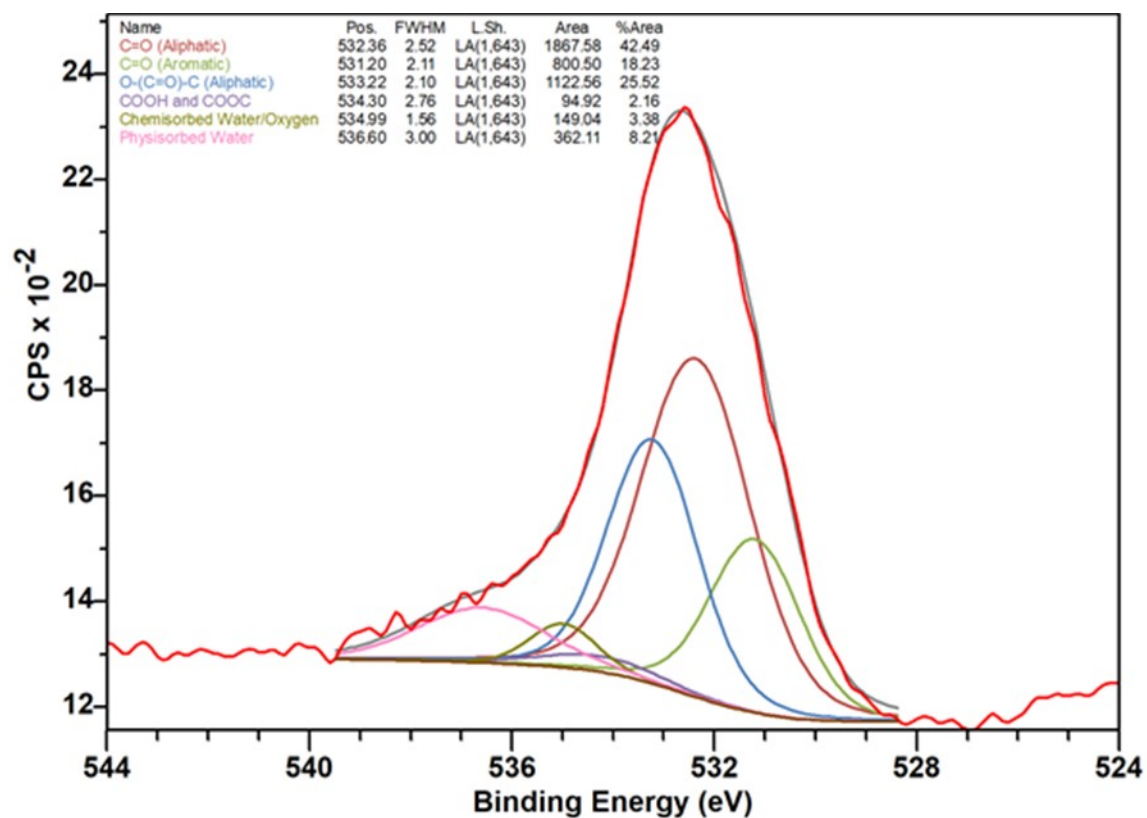

**Fig. S9.** Zoomed in and deconvoluted O 1s peak for an HNO<sub>3</sub>-AC sample. Peak fitting was conducted through manual entry of individual functional groups binding energies.

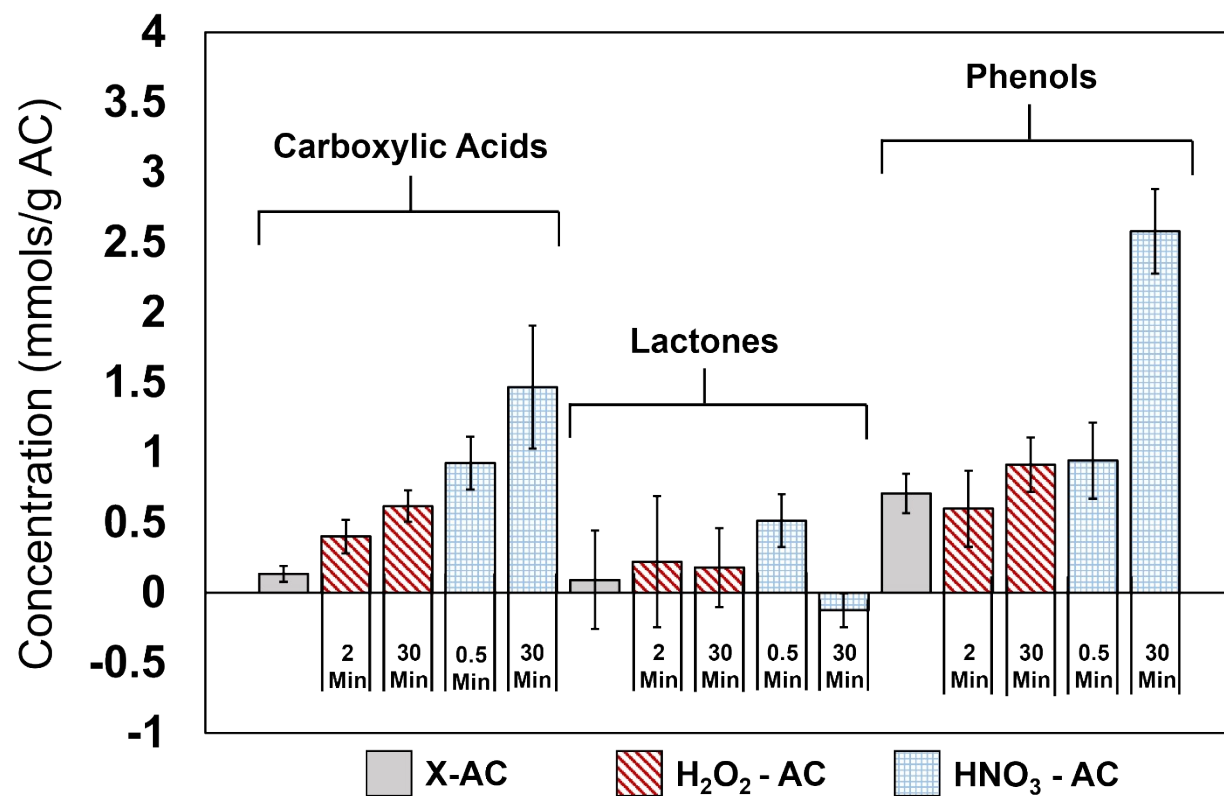

**Fig. S10.** Boehm titration results revealing individual functional group concentrations for X-AC, H<sub>2</sub>O<sub>2</sub>-AC, and HNO<sub>3</sub>-AC. Error bars represent the standard error of triplicates.

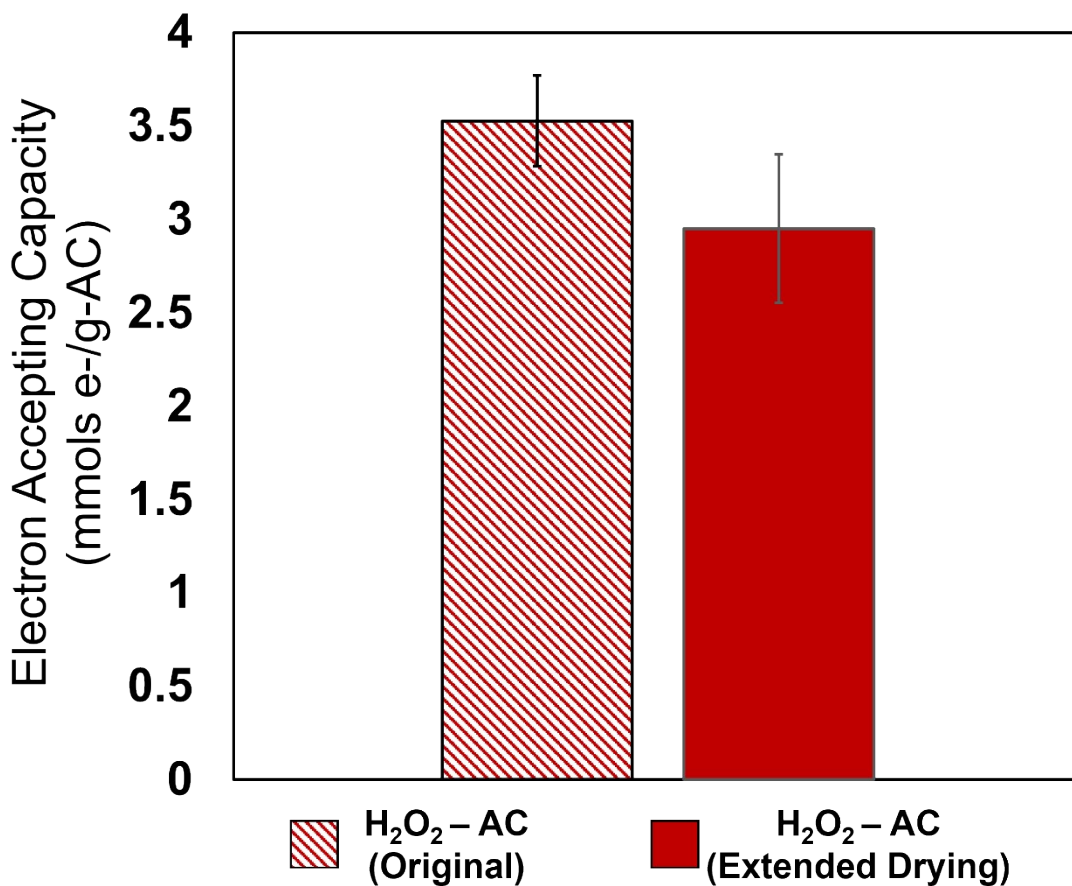

**Fig. S11.** EAC comparison between the 30-minute treated H<sub>2</sub>O<sub>2</sub>-AC sample dried at 70°C for ~30 min. and measured within 24-48 hrs and the 30-minute treated H<sub>2</sub>O<sub>2</sub>-AC sample dried at 105°C for ~3 hrs and measured after ~1.5 weeks. Error bars represent the standard error of triplicates.

### 3.3 Physical property correlation analysis

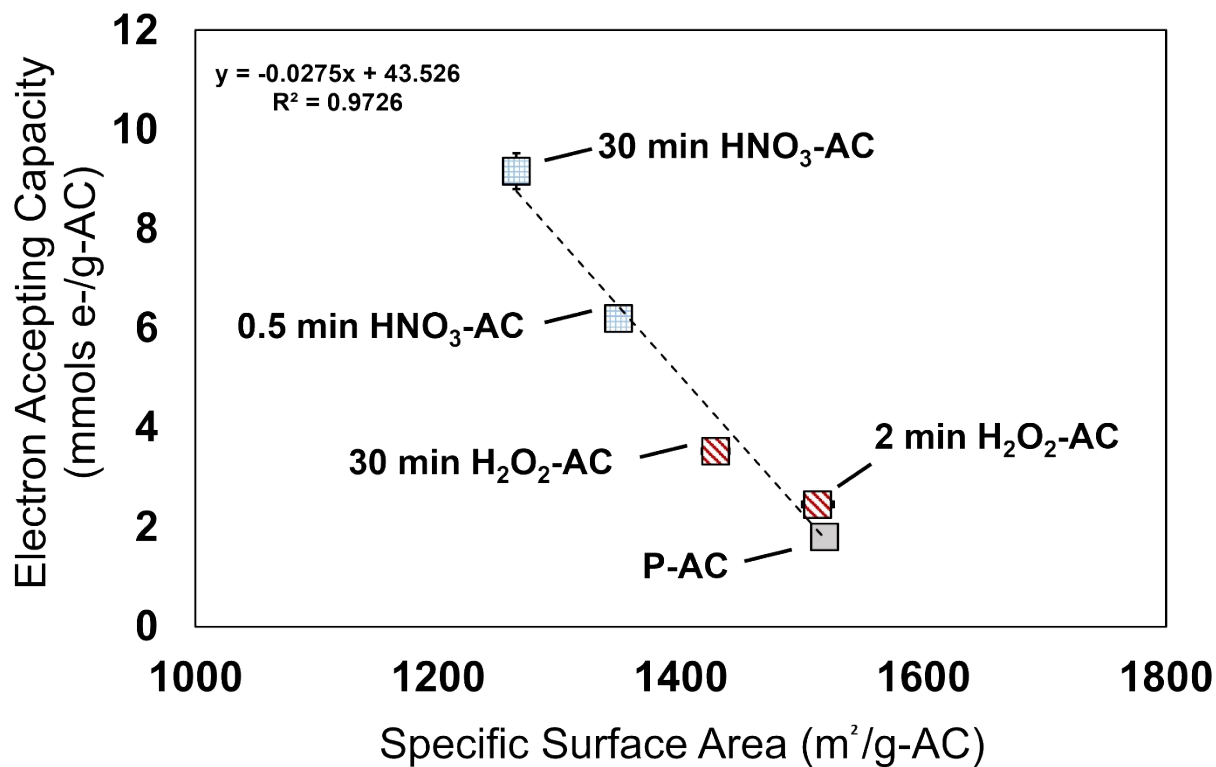

**Fig. S12.** Correlation plot between avg. specific surface area and avg. EAC for all untreated and treated materials. Error bars represent the standard error of three replicates.

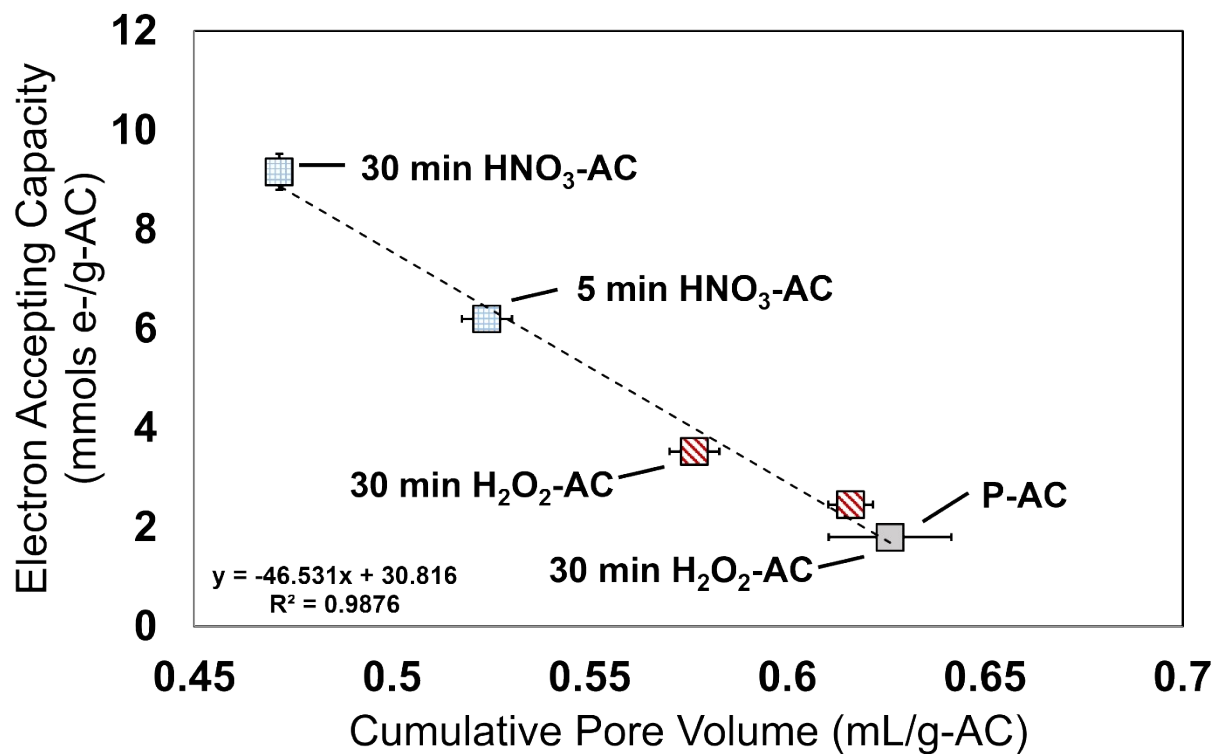

**Fig. S13.** Correlation plot between avg. cumulative pore volume and avg. EAC for all untreated and treated materials. Error bars represent the standard error of three replicates.
